# Supplementary material
Source: Springer Nature journal article supplement (https://www.springermedizin.de/resource/supplementary/12967_2011_998_MOESM2_ESM.pdf/9573524)

# anti-PSCA CAR + Protein L

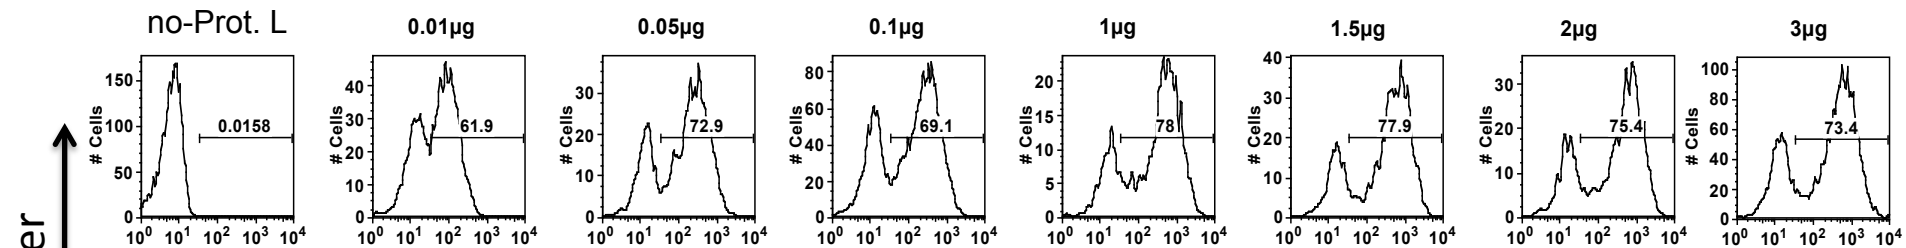

# anti-EGFRvIII CAR + Protein L

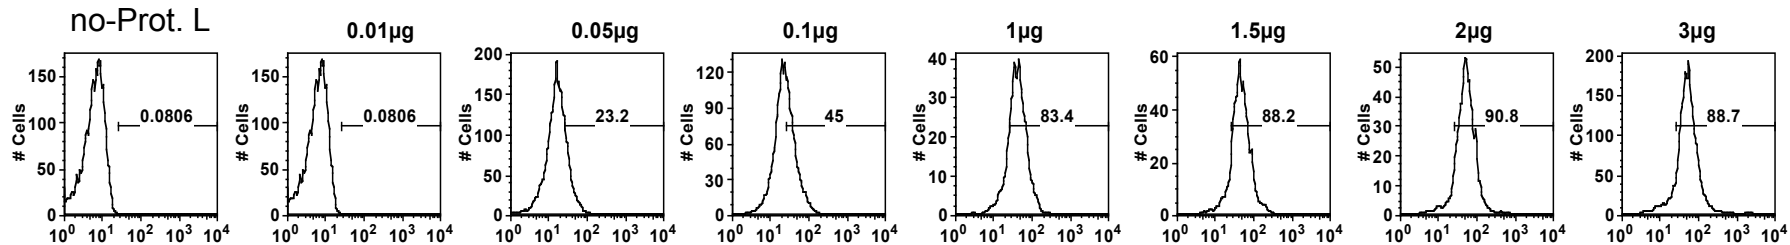

Fluorescence Intensity →

Supplement: MOESM2 [file 9573524]
